# Supplementary material
Source: PubMed Central journal article supplement (PMC3093533)
Supplement: 1102454108_pnas.201102454SI.pdf [file 1102454108_pnas.201102454SI.pdf]

# Supporting Information

Chaffer et al. 10.1073/pnas.1102454108

## SI Materials and Methods

**Cell Culture.** HME cells and all derivatives were cultured in MEGM media as previously described (1). HMECs were isolated from primary tissue as previously described (2) and cultured in M87A+X (3). For cell proliferation assays, cell numbers were determined from triplicate measures using the CellTiter 96 AQueous One Solution Cell Proliferation Assay (Promega) according to the manufacturer's instructions.

**Vectors and Viral Infections.** pBabe SV40-ER (Zeocin), pBabe H-Ras (Puromycin), PRRL-GFP, pLV-Tomato vectors, production of virus, and infection of target cells have been previously described (1, 4). Infected cells were selected with Zeocin (100  $\mu\text{g}/\text{mL}$ ) and Puromycin (2  $\mu\text{g}/\text{mL}$ ).

**Immunostaining.** Cells were grown on Labtek II Chamber slides (Nunc), fixed using 4% paraformaldehyde, and permeabilized with 0.2% Triton-X 100/PBS. For tissue sections, tumor samples were formalin fixed, paraffin embedded, and cut into 5- $\mu\text{m}$  sections. Antigen retrieval was performed with citrate buffer (pH 6.0) followed by boiling. Alexafluor-594 and -488 secondary antibodies (Invitrogen) were used for detection.

**Western Blot Analysis.** Protein was extracted from cell lysates using RIPA buffer. Western blots were performed using standard protocols. Blots were developed using ECL (Dura or Femto; Pierce). Horseradish peroxidase-conjugated secondary antibodies were used (Jackson Immunoresearch).

**3D Culture on Matrigel.** 3D culture of mammary epithelial cells on Matrigel was done as previously described (5).

**Mammosphere Culture.** Mammosphere culture was performed as previously described (6). For frozen sectioning, mammospheres were collected, incubated in 15% sucrose solution for 15 min, followed by 30% sucrose solution for 15 min, fixed in 4% paraformaldehyde for 30 min, and frozen in O.C.T. Compound (Tissue-Tek). Five-micrometer sections were cut. For flow cytometry analysis, mammospheres were dissociated into single cells by trypsinization.

**Flow Cytometry.** Cells were prepared according to standard protocols. Samples were sorted on a BD FACSAria SORP and analyzed on a BD LSRII using BD FACSDiva Software (BD Biosciences).

**Animal Studies.** All mouse studies were performed under the supervision of MIT's Division of Comparative Medicine in accordance with protocols approved by the Institutional Animal Care and Use Committee. Athymic female nude mice were purchased from Taconic Laboratories and NOD/SCID mice were bred in house. Mice were 2–4 mo of age at time of injections. Tumor cells were resuspended in 10% Matrigel/MEGM (20  $\mu\text{L}$ ) for mammary fat pad injections. Tumors were dissected at the end of the experiment and weighed. GFP-positive lung metastases were counted from individual lobes by fluorescent microscopy.

**Statistical Analysis.** Data are presented as mean  $\pm$  SEM. Student's *t* test (two-tailed) was used to compare two groups ( $P < 0.05$  was considered significant) unless otherwise indicated. Limiting dilution analysis was performed as previously described (7).

**Antibodies.** See Table S1.

**Microarray and Gene Set Enrichment Analysis.** Total RNA was isolated using the RNeasy Micro kit (Qiagen). Quality was determined by the Agilent Bioanalyzer 2100 (Agilent Technologies). Affymetrix human U133 Plus 2.0 arrays were used. Raw data from Affymetrix arrays was background corrected and normalized using robust multiarray average (RMA) from the affy R package (8). The gene set enrichment analysis (GSEA) was performed by the GSEA-P desktop application (9), using as gene sets the differentially expressed transcripts identified by Raouf et al. (10), from the comparisons of the bipotent CFC-enriched cell fraction with the mature myoepithelial cell fraction (table S1, sets 1–4) and luminal-restricted CFC-enriched with mature luminal cell fractions (table S1, sets 5–8).

**Determining Switching Rates ( $k_s$ ). Proliferation model.** The proliferation rates of for CD44<sup>hi</sup> (H) and CD44<sup>lo</sup> (L) cells are assumed to be

$$\dot{N}_H = k_H N_H + k_s N_L \quad [\text{S1}]$$

$$\dot{N}_L = (k_L - k_s) N_s, \quad [\text{S2}]$$

where  $k_H$  and  $k_L$  are the growth rates of CD44<sup>hi</sup> and CD44<sup>lo</sup> cells, respectively, and  $k_s$  is the transition rate for cells from the CD44<sup>lo</sup> to the CD44<sup>hi</sup> state. Transitions from the CD44<sup>hi</sup> to the CD44<sup>lo</sup> state are not observed. All cell types (HME, HMLE-flop, etc.) have distinct rate constants.

To solve the proliferation model, we use the canonical eigenvalue approach and write the equations as a matrix equation:

$$\frac{d}{dt} \begin{bmatrix} N_H \\ N_L \end{bmatrix} = \begin{bmatrix} k_H & k_s \\ 0 & k_L - k_s \end{bmatrix} \begin{bmatrix} N_H \\ N_L \end{bmatrix}. \quad [\text{S3}]$$

The eigenvalues and vectors are

$$\lambda_{H'} = k_H, X_{H'} = \begin{bmatrix} 1 \\ 0 \end{bmatrix}, \quad [\text{S4}]$$

$$\lambda_{L'} = k_L - k_s, X_{L'} = \begin{bmatrix} \chi \\ 1 \end{bmatrix}, \quad [\text{S5}]$$

where  $\lambda$  and  $X$  are the eigenvalues and vectors, respectively, and

$$\chi \equiv \frac{k_s}{k_L - k_s - k_H}. \quad [\text{S6}]$$

The proliferation dynamics are therefore described by the equations

$$\begin{bmatrix} N_H(t) \\ N_L(t) \end{bmatrix} = A_H X_{H'} \exp(\lambda_{H'} t) + A_L X_{L'} \exp(\lambda_{L'} t), \quad [\text{S7}]$$

where the two  $A$  parameters are chosen to match the initial populations.

**Fraction of newly derived CD44<sup>hi</sup> cells.** In the flow cytometry experiments, the observable is the fraction of CD44<sup>hi</sup> cells. This fraction can be written explicitly in terms of the proliferation solution Eq. S7,







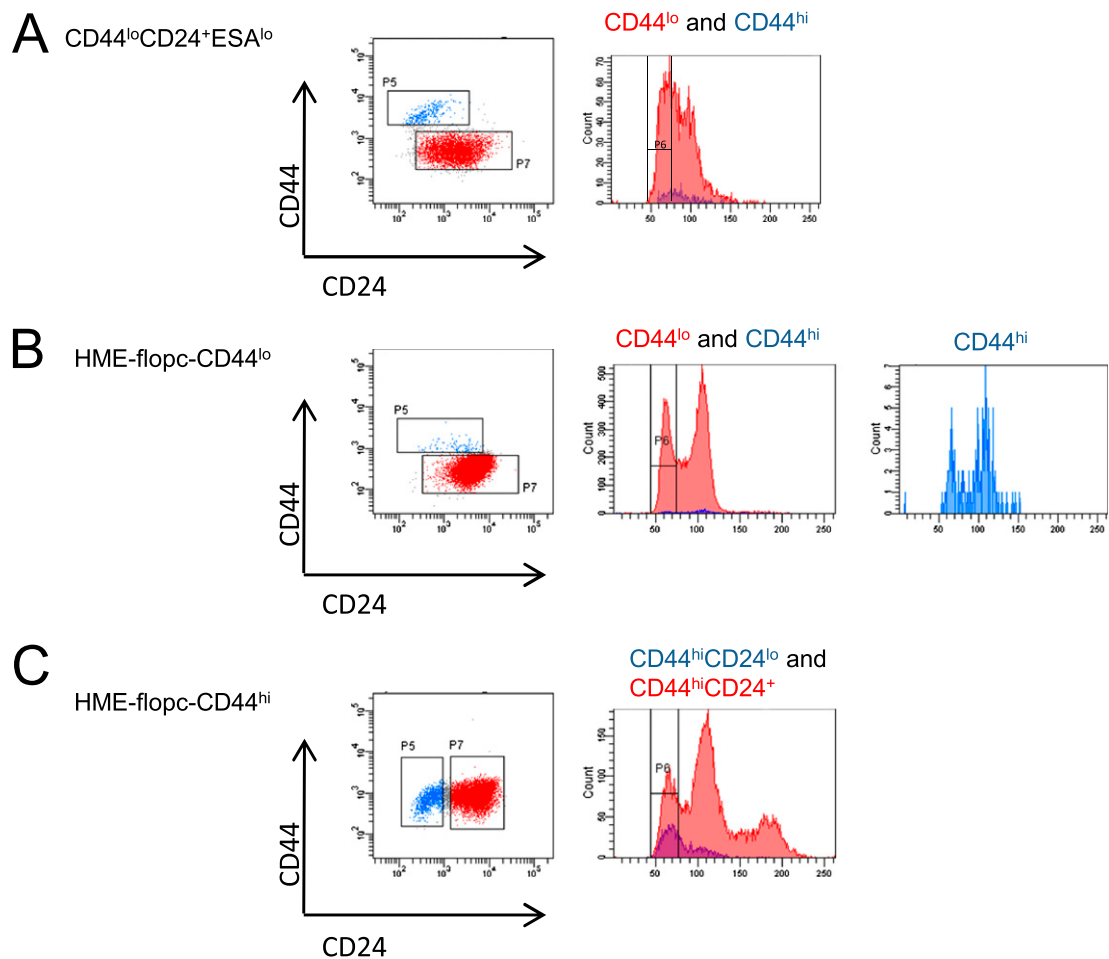

**Fig. S3.** (A) Hoechst staining to determine ploidy of different subpopulations of primary human mammary epithelial cells (HMECs). Subpopulations were purified by flow cytometry from the bulk HMEC population. After 12 d, when a population of de novo-derived  $CD44^{hi}CD24^{lo}ESA^{-}$  cells had arisen from the  $CD44^{lo}CD24^{+}ESA^{-}$  population, the cells were stained with Hoechst (1:1,000, 30 min).  $CD44^{lo}CD24^{+}ESA^{-}$  cells and de novo-derived  $CD44^{hi}CD24^{lo}ESA^{-}$  cells are diploid. (B and C) Hoechst staining to determine ploidy of different subpopulations of HME-flopc cells. (B) HME-flopc- $CD44^{lo}$  cells were purified by flow cytometry from the HME-flopc bulk population. After 12 d when a population of de novo-derived HME-flopc- $CD44^{hi}$  cells had arisen, the cells were stained with Hoechst (1:1,000, 30 min) and analyzed by flow cytometry for DNA content. Both HME-flopc- $CD44^{lo}$  and spontaneously arising HME-flopc- $CD44^{hi}$  cells are diploid. (C) Preexisting HME-flopc- $CD44^{hi}$  cells were purified by flow cytometry from the HME-flopc bulk population and analyzed by flow cytometry for DNA content. Preexisting HME-flopc- $CD44^{hi}$  cells contain a diploid ( $CD44^{hi}CD24^{lo}$ ) and a tetraploid ( $CD44^{hi}CD24^{+}$ ) population. Karyotype analysis demonstrated that the HME-flopc single-cell clones were tetraploid (Cell Line Genetics). We note that the biology observed between the normal HMECs, diploid HME-flopc- $CD44^{lo}$  cells, and the tetraploid single-cell clones did not differ, suggesting that the behavior of these various cell populations was not influenced by their ploidy.





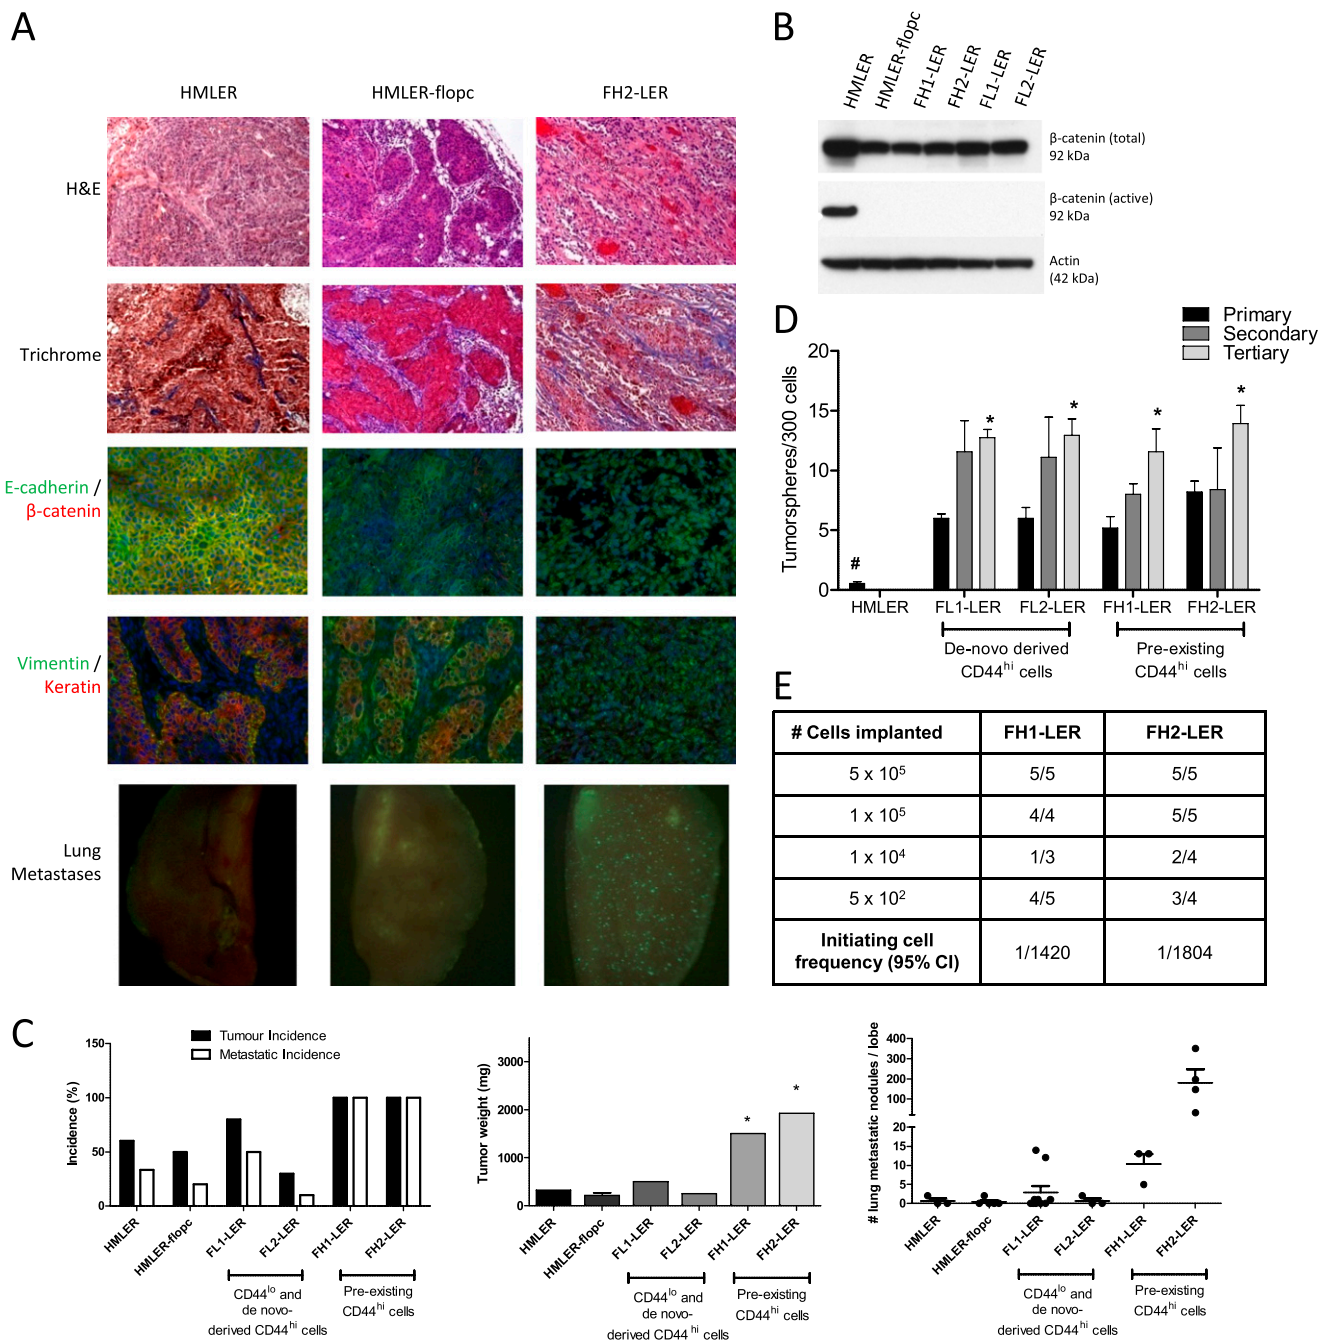

**Fig. 55.** (A) Comparison of tumor histology (hematoxylin and eosin staining and trichrome staining) for HMLER, HMLER-flopc, and FH2-LER (CD44<sup>hi</sup> single-cell clone); immunofluorescence for E-cadherin,  $\beta$ -catenin, vimentin, pan-cytokeratin (each 20 $\times$ ), and representative pictures of lung metastases formed by the different cell populations. We noted previously (Fig. 1B) that HME cells express abundant membranous E-cadherin and  $\beta$ -catenin, whereas HME-flopc cells do not. Similarly, we found that HMLER tumors showed abundant membrane-associated E-cadherin and  $\beta$ -catenin, whereas HMLER-flopc tumors showed dramatically reduced E-cadherin and  $\beta$ -catenin staining. We noted, however, that HMLER tumors expressed vimentin only where tumor cells were in close contact with stroma, whereas tumors derived from HMLER-flopc cells had an even distribution of vimentin-positive cells throughout. (B) Western blot analysis showing active  $\beta$ -catenin in HMLER cells only and decreased E-cadherin protein expression in FH1-LER and FH2-LER CD44<sup>hi</sup> single-cell clones. (C) Tumor incidence, weight, and metastatic ability (to lung) of various transformed HME subpopulations following orthotopic injection into NOD/SCID mice ( $5 \times 10^5$  cells/animal,  $n = 6-9$  animals/group,  $P < 0.05$ ). Transformed pure HME-flopc-CD44<sup>hi</sup> single-cell clones (SCCs) (FH1-LER and FH2-LER) exhibit the highest tumorigenicity and metastatic ability compared with HMLER cells and transformed HME-flopc populations (HMLER-flopc, FL1-LER, and FL2-LER). Results are mean  $\pm$  SEM. (D) Serial tumorsphere passage of HMLER cells and purified CD44<sup>hi</sup> cells from FL1-LER, FL2-LER, FH1-LER, and FH2-LER. Results are mean  $\pm$  SEM. # $P < 0.05$ , different from all other primary tumorspheres (one-way ANOVA, Newman-Keuls multiple comparison test); \* $P < 0.05$ , different from primary tumorspheres of the same cell line (Student's  $t$  test). (E) Limiting dilution analysis of two HME-flopc-CD44<sup>hi</sup> SCCs (FH1-LER and FH2-LER) following s.c. injection in nu/nu mice.
